# Supplementary material for: Formation of octacalcium phosphate with incorporated dicarboxylate ions containing disulfide bonds
Source: Royal Society of Chemistry journal article supplement (doi:10.1039/d3dt02462h), 2023-01-01
Supplement: d3dt02462h1.pdf [file d3dt02462h1.pdf]

## Electronic Supplementary Information

### Formation of octacalcium phosphate with incorporated dicarboxylate ions containing disulfide bonds

Taishi Yokoi,<sup>\*a</sup> Masahiro Watanabe,<sup>a</sup> Fumiya Nakamura,<sup>b</sup> Hiromi Kimura-Suda,<sup>b</sup> Masaya Shimabukuro,<sup>a</sup> and Masakazu Kawashita<sup>a</sup>

<sup>a</sup> Institute of Biomaterials and Bioengineering, Tokyo Medical and Dental University (TMDU), 2-3-10 Kanda-Surugadai, Chiyoda-ku, Tokyo 101-0062, Japan

<sup>b</sup> Chitose Institute of Science and Technology (CIST), 758-65 Bibi, Chitose, Hokkaido 066-8655, Japan

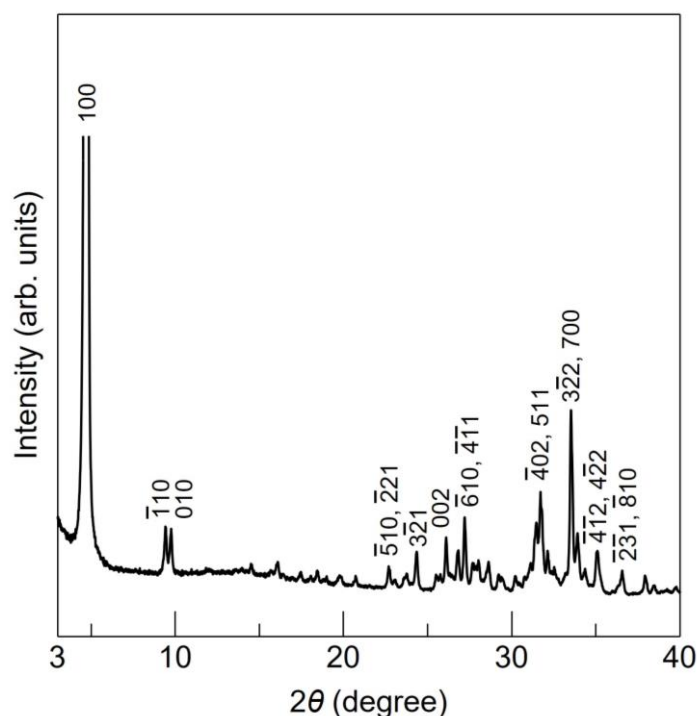

Fig. S1 XRD pattern of Pure-OCP.

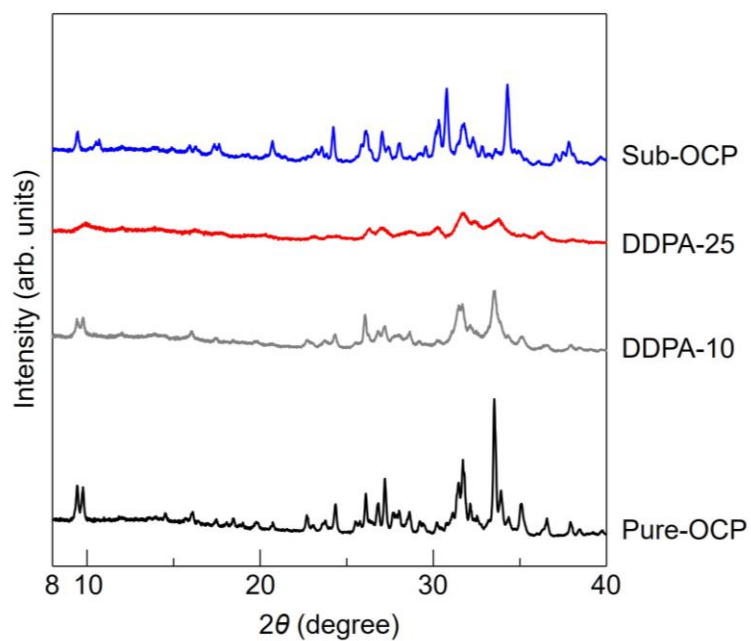

**Fig. S2** XRD patterns of Pure-OCP, DDPA-10, DDPA-25, and Sub-OCP in the 8–40° range.

Please refer to Fig. S1 for the assignment of reflection peaks for Pure-OCP. We deliberately refrained from assigning reflection peaks to DDPA-10, DDPA-25, and Sub-OCP. The rationale behind this decision is the absence of a powder diffraction file for OCP containing dicarboxylate ions.
